# Supplementary material
Source: Research Square preprint supplement (doi:10.21203/rs.3.rs-9895616/v1)
Supplement: Supplementary file 1 [file e81f42efd10c1cbdd0ecb809.pdf]

## **Title**

- **Evolutionary constraints decouple genetic diversity from adaptive capacity under climate change**

## **Authors**

Eddy Mendoza-Galindo<sup>1,†</sup>, Francisco Molina-Freaner<sup>2</sup>, Michiel Pilet<sup>3,4,‡</sup>, Michelle Cabrera-Guerra<sup>5</sup>, Antonio Hernández-López<sup>5</sup>, Tram Vi<sup>6</sup>, Piero Foncerrada-Elizondo<sup>5</sup>, Diana I. Martínez-Lona<sup>7</sup>, Tania Hernández-Hernández<sup>4,8\*</sup>

## **This PDF file includes:**

Supplementary Methods (Health Score Determination, DNA extraction: modified CTAB protocol, Equations)

Figs. S1 to S9

Tables S1 to S9

## **Other Supplementary Materials for this manuscript include the following:**

Mendoza\_etal2026\_Supplementary Data\_v1.tsv

**Supplementary Methods. Health Score Determination**

Health scores for each locality visited for this study were determined using the following questionnaire:

I. Abundance (number of individuals visible from a determined spot)

From a given spot in the locality, what do you see?

1. Only a handful of individuals (<5)
2. More individuals but still few, very spaced out (5-10)
3. Good number of individuals, they are closer together but still spaced out
4. Plenty of individuals, it is not possible to count them (saguaro forest)

II. Plant condition (this is the actual health of the plants, average the condition observed for all individuals in the locality; follow the next table as a guide)

1. Poor
2. Fair
3. Good
4. Excellent

|                  | <b>Herbivory</b>            | <b>Frost damage</b>   | <b>Sun scorch</b>                       | <b>Arms</b>                    | <b>Dehydration</b> | <b>Leaning</b>                                                                       | <b>Rot</b>                       | <b>Any other wound</b>      |
|------------------|-----------------------------|-----------------------|-----------------------------------------|--------------------------------|--------------------|--------------------------------------------------------------------------------------|----------------------------------|-----------------------------|
| <b>Excellent</b> | None                        | None                  | None                                    | Normal                         | None               | 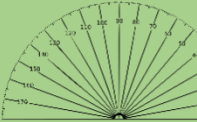  | None                             | None                        |
| <b>Good</b>      | Little and all healed       | Slight and all healed | None                                    | Normal                         | None               |  | None                             | Slight and healed           |
| <b>Fair</b>      | <i>Extensive but healed</i> | Extensive, but healed | <i>Orange or brown, rough epidermis</i> | <i>Slightly bent or broken</i> | Slight             |  | <i>Healed</i>                    | <i>Extensive but healed</i> |
| <b>Poor</b>      | <i>Not healed</i>           | <i>Not healed</i>     | <i>Bright yellow, smooth epidermis</i>  | <i>Very bent or broken</i>     | <i>Significant</i> |  | <i>Squishy-looking or oozing</i> | <i>Not healed</i>           |

III. Reproduction (flower/fruit/flower buds)

1. No flower buds, flowers or fruits. Flower buds look aborted
2. Extremely few flowers/fruits/flower buds, they also look small (10-20 per plant)
3. More abundant flowers/fruits/flower buds

4. High abundance of flowers/fruits/flower buds. Fruits can be found in the ground
- IV. Cohort replacement (recruitment, are there babies? Young plants?)
1. No babies ( $>3$  ft), no young plants (3-16 ft)
  2. Rarely babies or young plants
  3. More frequent babies or young plants, not as abundant as adults
  4. High abundance of babies or young plants. As many perhaps as adult plants

\*Notes: average yield for locality Sabino Canyon was estimated using average yield for Saguaro National Park E and W; which are in the same region. Yield for Superstitions locality was estimated using yield from Superior locality due to their proximity.

### **Supplementary Methods. DNA extraction: modified CTAB protocol**

Genomic DNA was extracted from frozen tissue samples using a modified CTAB-based protocol that combined elements from two optimized procedures.

Frozen samples were thawed on ice for 10 minutes and homogenized in 750–800  $\mu\text{L}$  of preheated 2 $\times$  CTAB extraction buffer containing 1 M Tris-HCl (pH 8.0), 5 M NaCl, 0.25 M EDTA (pH 8.0), 0.4 mL  $\beta$ -mercaptoethanol, and 0.032 g PVP-40 per sample. Samples were mixed thoroughly until a uniform suspension was obtained and incubated at 55–65  $^{\circ}\text{C}$  overnight, inverting the tubes several times during incubation.

Following lysis, 4  $\mu\text{L}$  RNase A (10 mg/mL) was added to each tube, and samples were incubated for an additional 30 min at 55  $^{\circ}\text{C}$ . Phase separation was performed by adding an equal volume (700–800  $\mu\text{L}$ ) of SEVAG solution (chloroform: isoamyl alcohol, 24 : 1 v/v), mixing gently by inversion until emulsified, and centrifuging at 14 000 rpm for 10–15 min. The upper aqueous phase was transferred to a new tube, and DNA was precipitated with 0.33 volumes of cold isopropanol ( $-20^{\circ}\text{C}$ ). Samples were centrifuged at 12 000 rpm for 10 min, and the resulting pellets were air-dried at 37  $^{\circ}\text{C}$  before resuspension in 200  $\mu\text{L}$  of nuclease-free water.

DNA was further purified by adding 20  $\mu\text{L}$  of 2.5 M sodium acetate and 500  $\mu\text{L}$  of 95% cold ethanol, incubating for 2h at  $-20^{\circ}\text{C}$ , and centrifuging at 12 000 rpm for 5 min. Pellets were washed twice with 1 mL of 70% cold ethanol, centrifuged again, briefly air-dried, and resuspended in 70  $\mu\text{L}$  of nuclease-free water.

For samples requiring additional purification, the aqueous phase from the CTAB extraction was mixed with 900  $\mu\text{L}$  of PB binding buffer (5 M guanidine-HCl, 30% isopropanol) and loaded onto silica spin columns pre-equilibrated with 20  $\mu\text{L}$  of 2.5 M sodium acetate. Columns were washed twice with 750  $\mu\text{L}$  of PE buffer (10 mM Tris-HCl, pH 7.5, 80% ethanol) and centrifuged at 14 000 rpm for 1 min each. After drying, DNA was eluted in two successive steps with 100  $\mu\text{L}$  and 50  $\mu\text{L}$  of pre-warmed (55  $^{\circ}\text{C}$ ) TE buffer (10 mM Tris-HCl, 1 mM EDTA, pH 8.0), incubating for 15 min prior to each centrifugation.

DNA quality and yield were evaluated by spectrophotometry and agarose gel electrophoresis.

Extracted DNA was stored at  $-20^{\circ}\text{C}$  for short-term use and at  $-80^{\circ}\text{C}$  for long-term preservation.

## **Supplementary Methods. Equations**

### **Equation 1.**

We defined the deleterious load DL as the proportion of deleterious d nonsynonymous polymorphic sites (PN) to all polymorphic sites (including synonymous polymorphic sites PS):

$$DL = PN / PS$$

### **Equation 2.**

We manually estimated Watterson's estimator  $\Theta_W$  for each gene following the formula:

$$\Theta_W = \frac{S}{\sum_{i=1}^{n-1} 1/i}$$

Where  $S$  stands for the number of segregating sites (SNPs) in the gene of interest, and  $n$  the sample number of each genetic group.

### **Equation 3.**

Tajima's D values were calculated for each gene and group using the formula:

$$D = \frac{\pi - \Theta_W}{\sqrt{\text{Var}(\pi - \Theta_W)}}$$

### **Equation 4.**

We fitted Mixed Effects Linear Models (MELMs) as follows:

$$\text{Health Score} = \text{Environmental variable}^i \alpha + \text{Genetic group} \beta + K\mu + e$$

Where the *Health Score* is explained by the fixed effects ( $\alpha$ ,  $\beta$ ) of each environmental variable  $i$  and the genetic group, the random effect  $\mu$  of the genetic kinship matrix  $K$ , and the residuals  $e$ .

### **Equation 5.**

We used the following formula to estimate genome-wide environmental associations using MELMs:

$$y = X\alpha + P\beta + K\mu + e$$

Where  $y$  represents the observed value for each tested environmental variable, the fixed effect  $X$  represents the SNP genotype, and to correct for population structure and relatedness, we added the fixed effect  $P\beta$ , which represents the PCA matrix with the first two components, and the random effect of the kinship matrix  $K\mu$ .

**Fig. S1.**

**Per-sample and per-site missingness rate for the unfiltered SNP data.** Red dashed lines indicate thresholds used in this study.

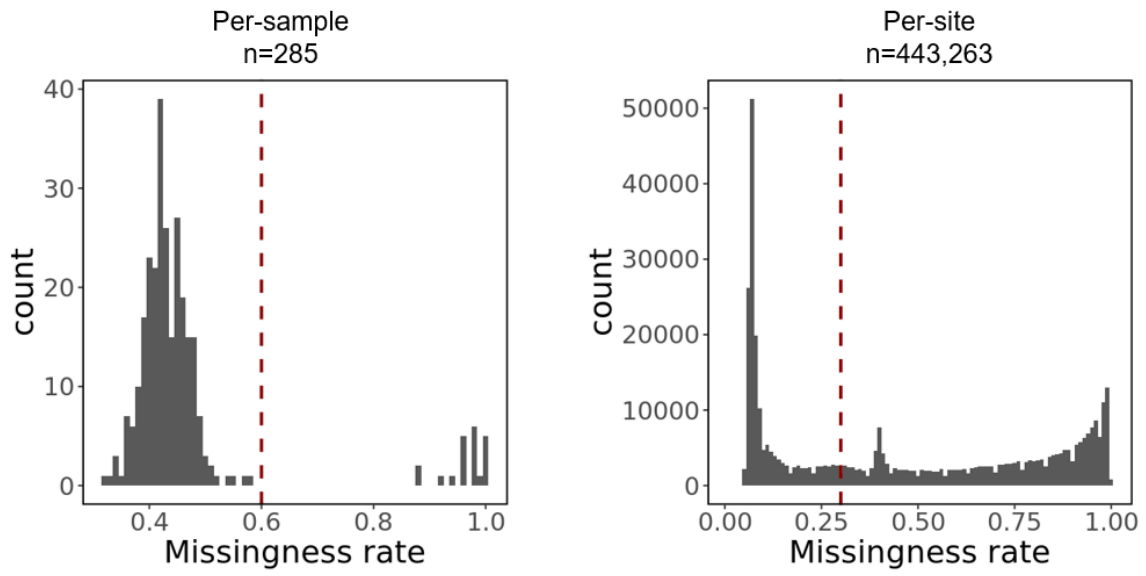

**Fig. S2.**  
**Relationship between genetic PC1 and latitude in wild saguaros.** Blue dots represent the North group; green represent the South group.

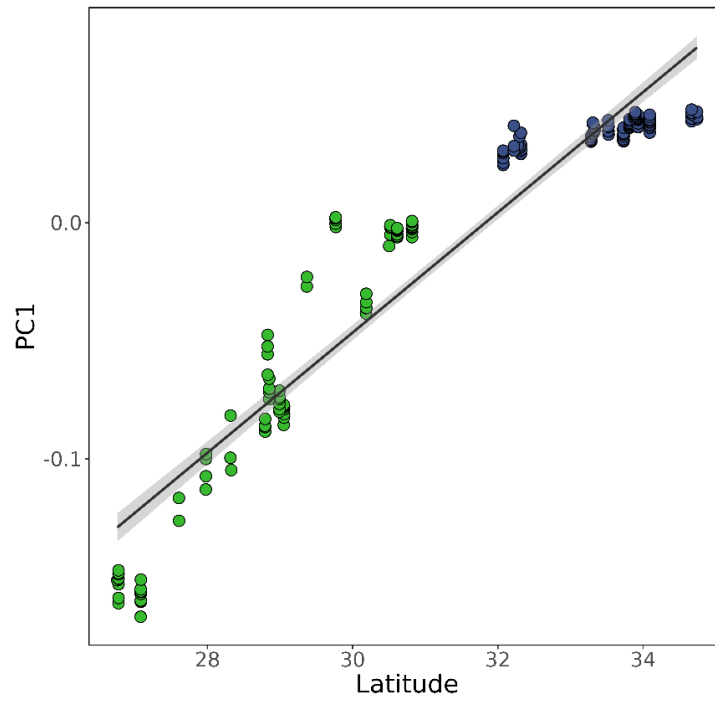

**Fig. S3.**  
**Genetic divergence between the North and South groups.** Each dot represents one SNP.

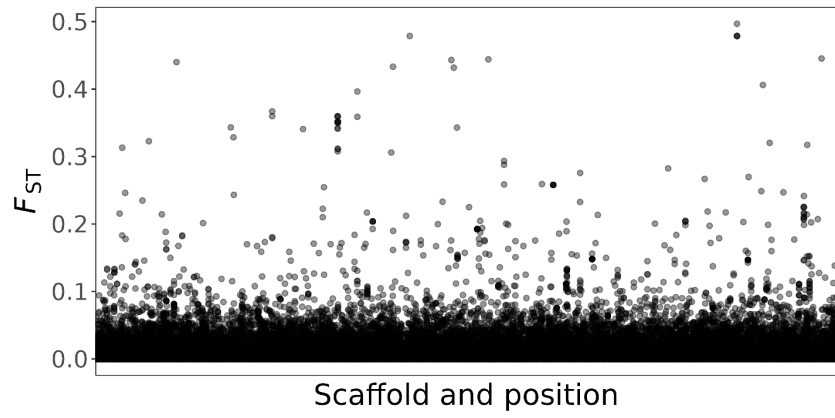

**Fig. S4.**

**Distribution of errors in the Admixture analysis.** Admixture was run with 100 random replicates per  $K$  (gray dots). Mean cross-validation error rate is shown in red for each  $K$ . Bootstrap errors were estimated by averaging the standard deviation values of ancestry coefficients per  $K$  (size of red dots).  $K = 5$  was chosen as it shows the narrowest distribution without outliers as compared to  $K = 6$  and  $K = 4$ .

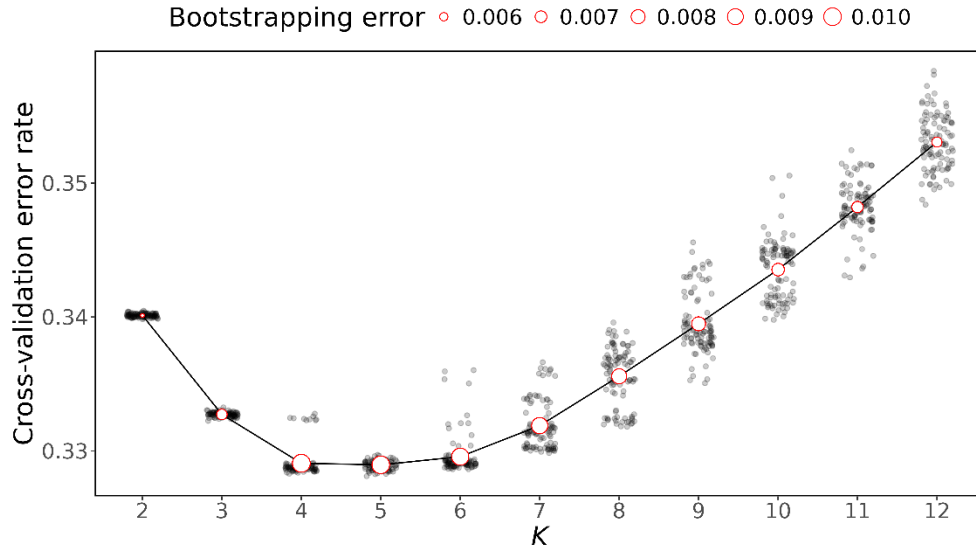

**Fig. S5.**  
**Linkage disequilibrium decay in North (blue) and South (green) groups.**  
Distance is calculated in base pairs.  $R^2$  values are averaged in bins of 100 bp.

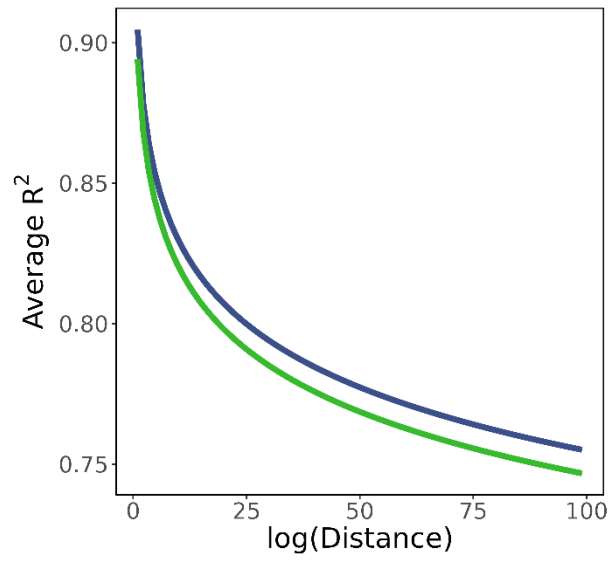

**Fig. S6.**  
**GWAS sanity checks.** (A) Distribution of P values for each variable. (B) Q-Q plot for the P values.

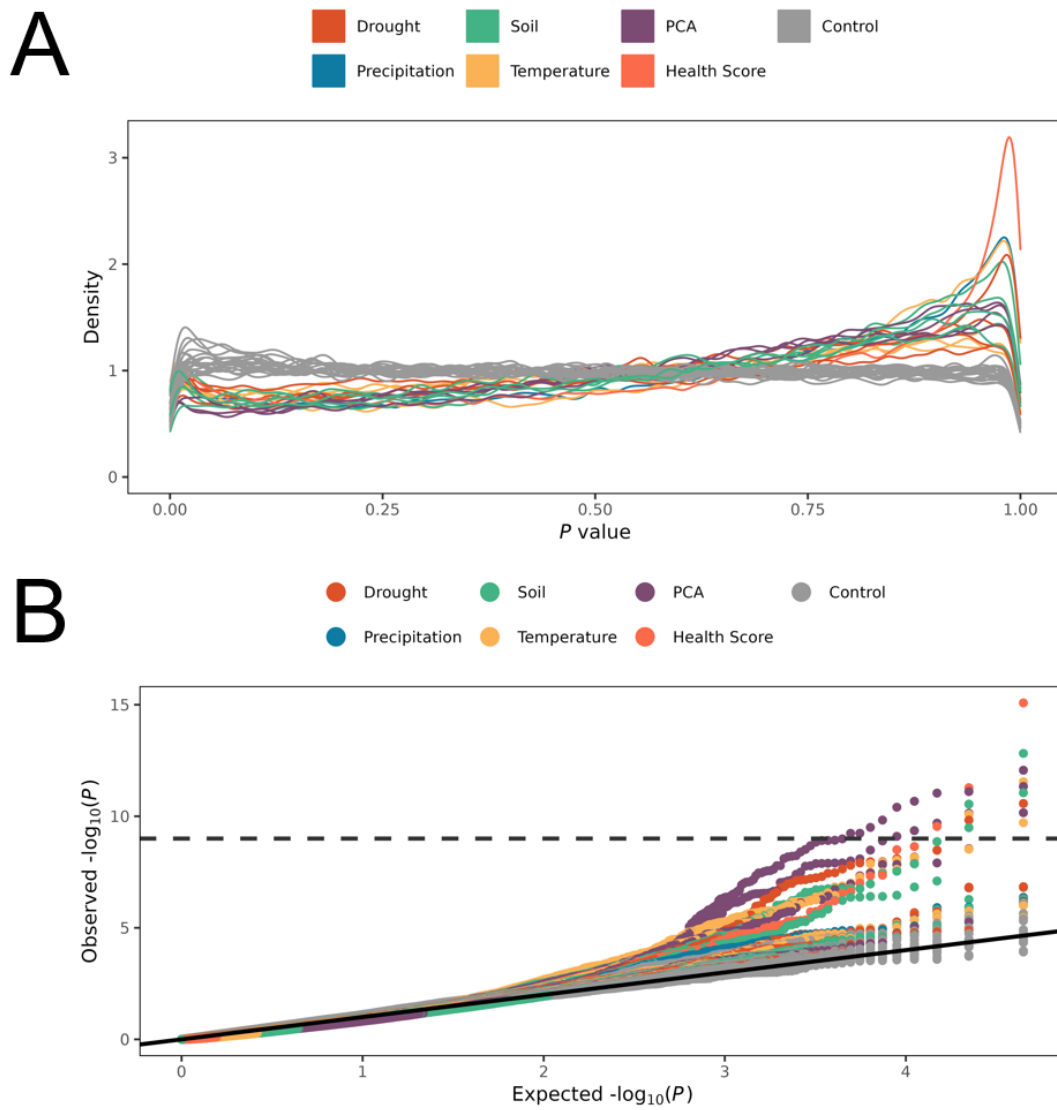

Fig. S8.

Work flow diagram illustrating the analysis of signatures of selection in candidate genes.

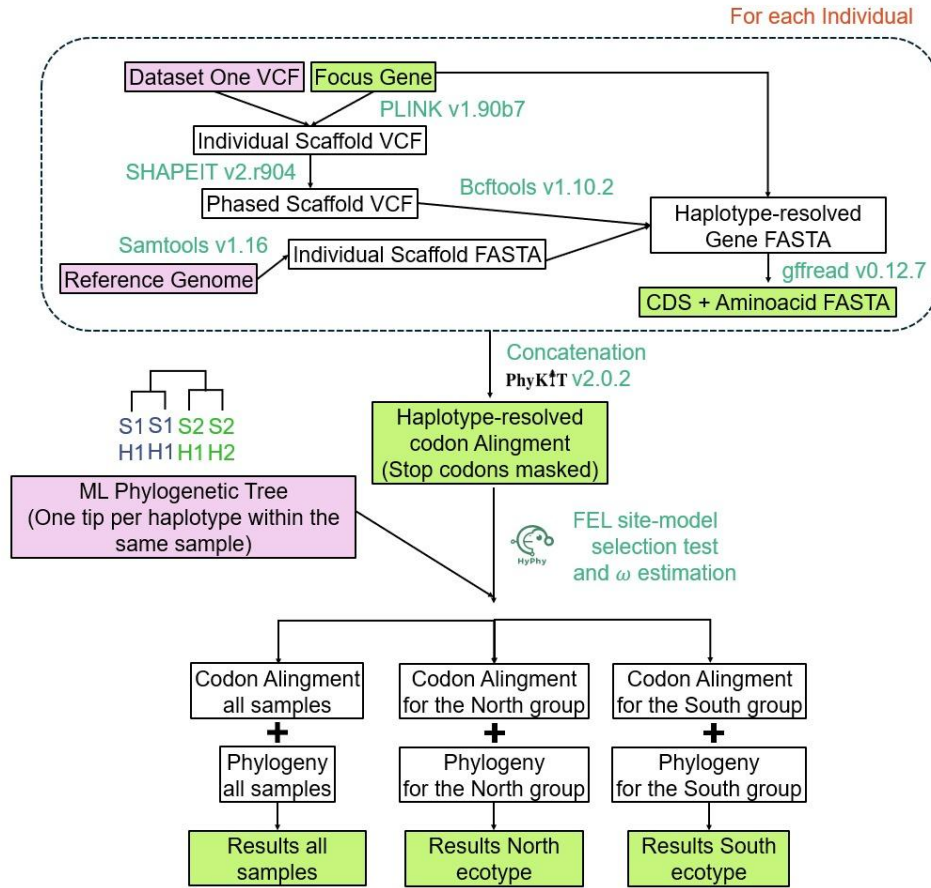

**Fig. S9.**

**Sensitivity analysis of genomic offset using random SNP sets.**

Distribution of the number of times genomic offset estimated from randomly sampled SNP sets exceeds that derived from the 17 environmentally associated candidate SNPs identified by GWAS. For each scenario, 1000 random sets of 17 SNPs were drawn from the full dataset to generate a null distribution. Vertical lines indicate the expected value under the null hypothesis (i.e., 500 out of 1000 iterations). Panels correspond to three climate scenarios: SSP1–2.6 (left), SSP3–7.0 (center), and SSP5–8.5 (right). Across all scenarios, genomic offset based on candidate adaptive SNPs consistently exceeds that expected from random SNP sets, with stronger deviations observed under higher-emission scenarios. These results support that the identified SNPs capture non-random, environmentally associated variation relevant to adaptive responses under future climate change.

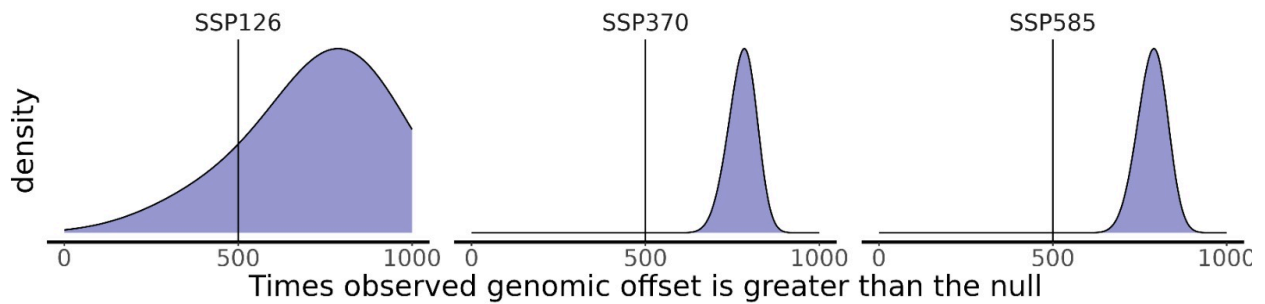

**Table S1.****Media documentation of recent saguaro decline in the Phoenix Metropolitan Area.**

This table summarizes representative regional, national, and international media coverage reporting increased saguaro mortality, structural failure, and physiological stress associated with extreme heat and drought in and around the Phoenix Metropolitan Area. Together, these reports illustrate growing public concern and awareness of saguaro decline and provide independent, contemporaneous documentation of the spatial extent, timing, and severity of recent impacts on this iconic desert species.

| <b>Year</b> | <b>Scope</b>   | <b>Outlet</b>           | <b>Title</b>                                                                   | <b>Link</b>                                                                                                                                                                                                                                                                                     | <b>Description</b>                                                                                               |
|-------------|----------------|-------------------------|--------------------------------------------------------------------------------|-------------------------------------------------------------------------------------------------------------------------------------------------------------------------------------------------------------------------------------------------------------------------------------------------|------------------------------------------------------------------------------------------------------------------|
| 2020        | National (US)  | AZ Central              | Will the iconic saguaro cactus start to disappear from parts of the Southwest? | <a href="https://www.azcentral.com/story/news/local/arizona-environment/2020/06/18/saguaro-cactus-imperiled-climate-change-and-humans/3000183001/">https://www.azcentral.com/story/news/local/arizona-environment/2020/06/18/saguaro-cactus-imperiled-climate-change-and-humans/3000183001/</a> | Early warning that climate change and human pressures could push saguaros out of parts of the Sonoran Desert.    |
| 2021        | Regional-Local | Desert Botanical Garden | A Disappearing Icon                                                            | <a href="https://dbg.org/a-disappearing-icon/">https://dbg.org/a-disappearing-icon/</a>                                                                                                                                                                                                         | DBG blog noting that summer 2020 brought many reports of collapsing and failing urban saguaros around Phoenix.   |
| 2021        | National (US)  | The Washington Post     | Saving the West's most iconic cactus from climate change                       | <a href="https://www.washingtonpost.com/climate-solutions/interactive/2021/saguaro-cactus-climate-change/">https://www.washingtonpost.com/climate-solutions/interactive/2021/saguaro-cactus-climate-change/</a>                                                                                 | Drought and record heat in 2020 raised concerns about the saguaro's long-term survival under warming conditions. |
| 2021        | Regional-Local | FOX10 Phoenix           | Arizonans are seeing unusual saguaro blooms...                                 | <a href="https://www.fox10phoenix.com/news/arizonans-are-seeing-unusual-saguaro-blooms-and-experts-arent-sure-why">https://www.fox10phoenix.com/news/arizonans-are-seeing-unusual-saguaro-blooms-and-experts-arent-sure-why</a>                                                                 | Experts link unusual flowering to prior heat and drought damage (2017–2020).                                     |
| 2023        | International  | Reuters                 | Saguaro cacti collapsing in Arizona extreme heat, scientist says               | <a href="https://www.reuters.com/business/environment/saguaro-cacti-collapsing-arizona-extreme-heat-scientist-says-2023-07-25/">https://www.reuters.com/business/environment/saguaro-cacti-collapsing-arizona-extreme-heat-scientist-says-2023-07-25/</a>                                       | Global wire story linking record Phoenix heat to leaning, arm loss, and collapse.                                |
| 2023        | International  | The Guardian            | Phoenix's extreme heat withers saguaros, trademark cactus of desert landscape  | <a href="https://www.theguardian.com/us-news/2023/aug/03/phoenix-extreme-heat-withers-saguaros-cactus">https://www.theguardian.com/us-news/2023/aug/03/phoenix-extreme-heat-withers-saguaros-cactus</a>                                                                                         | International coverage of saguaros failing during historic Phoenix heat.                                         |

| <b>Year</b> | <b>Scope</b>        | <b>Outlet</b>                  | <b>Title</b>                                                                                      | <b>Link</b>                                                                                                                                                                                                                                                                                                                                                                                                                                       | <b>Description</b>                                                                                                                                                            |
|-------------|---------------------|--------------------------------|---------------------------------------------------------------------------------------------------|---------------------------------------------------------------------------------------------------------------------------------------------------------------------------------------------------------------------------------------------------------------------------------------------------------------------------------------------------------------------------------------------------------------------------------------------------|-------------------------------------------------------------------------------------------------------------------------------------------------------------------------------|
| 2023        | Regional-Local      | FOX10 Phoenix                  | Arizona saguaros are collapsing in this extreme heat, and experts are worried                     | <a href="https://www.fox10phoenix.com/news/arizona-saguaros-are-collapsing-in-this-extreme-heat-and-experts-are-worried">https://www.fox10phoenix.com/news/arizona-saguaros-are-collapsing-in-this-extreme-heat-and-experts-are-worried</a>                                                                                                                                                                                                       | Local reporting on urban saguaros failing during July 2023 heatwave.                                                                                                          |
| 2023        | National (US)       | CNN                            | Phoenix's record heat is killing off cactuses                                                     | <a href="https://www.cnn.com/2023/07/27/us/phoenix-arizona-heat-saguaro-cactuses">https://www.cnn.com/2023/07/27/us/phoenix-arizona-heat-saguaro-cactuses</a>                                                                                                                                                                                                                                                                                     | National coverage of cactus mortality during prolonged extreme heat.                                                                                                          |
| 2023        | National (US)       | AP News                        | The extreme heat in Phoenix is withering some of its famed saguaro cactuses, with no end in sight | <a href="https://apnews.com/article/heat-wave-phoenix-cactus-plants-974dfd0a5b19f804837d90a96b567ede">https://apnews.com/article/heat-wave-phoenix-cactus-plants-974dfd0a5b19f804837d90a96b567ede</a>                                                                                                                                                                                                                                             | Residents and DBG share images of damaged and collapsed saguaros.                                                                                                             |
| 2023        | Regional-Local (AZ) | Desert Diaries (Desert Museum) | Are saguaros dying in Arizona?                                                                    | <a href="https://blog.desertmuseum.org/2023/08/30/are-saguaros-dying-in-arizona/">https://blog.desertmuseum.org/2023/08/30/are-saguaros-dying-in-arizona/</a>                                                                                                                                                                                                                                                                                     | Explains mechanisms such as night heat and stem softening behind collapses.                                                                                                   |
| 2023        | Regional-Local (AZ) | Axios Phoenix                  | Help save cactuses with the 2023 saguaro census                                                   | <a href="https://www.axios.com/local/phoenix/2023/05/08/saguaro-cactus-census-2023-phoenix-desert-botanical-garden">https://www.axios.com/local/phoenix/2023/05/08/saguaro-cactus-census-2023-phoenix-desert-botanical-garden</a>                                                                                                                                                                                                                 | Launch of community census following reports of widespread saguaro decline.                                                                                                   |
| 2023        | International       | 12News                         | Los saguaros urbanos caen muertos debido al calor extremo ...                                     | <a href="https://www.12news.com/article/syndication/spanish/los-saguaros-urbanos-estan-cayendo-muertos-por-el-calor-extremo-y-nosotros-le-mostramos-como-salvarlos-en-su-propiedad/75-7ed2eff2-3f86-462b-be96-cf5482ebc374">https://www.12news.com/article/syndication/spanish/los-saguaros-urbanos-estan-cayendo-muertos-por-el-calor-extremo-y-nosotros-le-mostramos-como-salvarlos-en-su-propiedad/75-7ed2eff2-3f86-462b-be96-cf5482ebc374</a> | Spanish-language explainer on urban saguaros collapsing in Phoenix.                                                                                                           |
| 2023        | International       | Univision                      | Ola de calor excesivo está acabando con los saguaros                                              | <a href="https://www.univision.com/local/arizona-ktvw/ola-de-calor-pone-en-riesgo-saguaros-arizona-fotos">https://www.univision.com/local/arizona-ktvw/ola-de-calor-pone-en-riesgo-saguaros-arizona-fotos</a>                                                                                                                                                                                                                                     | Photo report on saguaros collapsing due to extreme heat and lack of rain.                                                                                                     |
| 2023        | International       | Yahoo Noticias (ES)            | Calor extremo en Phoenix también estresa a saguaros, árboles frutales y otras plantas             | <a href="https://es-us.noticias.yahoo.com/calor-extremo-phoenix-estresa-saguaros-011321043.html">https://es-us.noticias.yahoo.com/calor-extremo-phoenix-estresa-saguaros-011321043.html</a>                                                                                                                                                                                                                                                       | Spanish language article reports on how intense heat waves in Phoenix are stressing and damaging saguaro cacti, causing many to weaken and even die in the metropolitan area. |

| <b>Year</b> | <b>Scope</b>        | <b>Outlet</b> | <b>Title</b>                                                                          | <b>Link</b>                                                                                                                                                                                                                                                                                                                                                                       | <b>Description</b>                                                                                                        |
|-------------|---------------------|---------------|---------------------------------------------------------------------------------------|-----------------------------------------------------------------------------------------------------------------------------------------------------------------------------------------------------------------------------------------------------------------------------------------------------------------------------------------------------------------------------------|---------------------------------------------------------------------------------------------------------------------------|
| 2023        | International       | Le HuffPost   | Même ces cactus mythiques ne supportent plus la chaleur                               | <a href="https://www.huffingtonpost.fr/international/video/en-arizona-meme-ces-cactus-mythiques-ne-supportent-plus-les-conditions-climatiques-extremes_221608.html">https://www.huffingtonpost.fr/international/video/en-arizona-meme-ces-cactus-mythiques-ne-supportent-plus-les-conditions-climatiques-extremes_221608.html</a>                                                 | French video/article on saguaros failing under extreme conditions.                                                        |
| 2023        | International       | TF1 INFO      | États-Unis : face à la chaleur en Arizona, même les cactus s'effondrent               | <a href="https://www.tf1info.fr/environnement-ecologie/etats-unis-changement-climatique-face-a-la-vague-de-chaleur-canicule-a-phoenix-en-arizona-meme-les-cactus-s-effondrent-2266351.html">https://www.tf1info.fr/environnement-ecologie/etats-unis-changement-climatique-face-a-la-vague-de-chaleur-canicule-a-phoenix-en-arizona-meme-les-cactus-s-effondrent-2266351.html</a> | French TV site: Phoenix street saguaros losing arms/collapsing.                                                           |
| 2023        | International       | RND.de        | Rekordhitze in Arizona: Meterhohe Saguaro-Kakteen kippen einfach um – „wie gebacken   | <a href="https://www.rnd.de/panorama/arizona-rekord-hitze-laesst-saguaro-kakteen-umkippen-PTWTQHRWQ5JONHG6SAIMBYOOAE.html">https://www.rnd.de/panorama/arizona-rekord-hitze-laesst-saguaro-kakteen-umkippen-PTWTQHRWQ5JONHG6SAIMBYOOAE.html</a>                                                                                                                                   | German national outlet reporting saguaros toppling during record heat.                                                    |
| 2023        | International       | ABC news      | VIDEO: Arizona's extreme heat and drought is impacting the state's iconic Saguaro     | <a href="https://www.abc.net.au/news/2023-07-26/arizonas-extreme-heat-and-drought-is-impacting-the-saguaro/102650164">https://www.abc.net.au/news/2023-07-26/arizonas-extreme-heat-and-drought-is-impacting-the-saguaro/102650164</a>                                                                                                                                             | A report in DBG states that the saguaro cacti are suffering from the intense heat and drought.                            |
| 2024        | Regional-Local (AZ) | AZCentral     | Heat, extreme weather can kill Arizona's saguaros                                     | <a href="https://www.azcentral.com/story/news/local/arizona-environment/2024/03/18/arizona-saguaros-desert-plants-dying-as-climate-changes/72843966007/">https://www.azcentral.com/story/news/local/arizona-environment/2024/03/18/arizona-saguaros-desert-plants-dying-as-climate-changes/72843966007/</a>                                                                       | Explainer linking saguaros' decline to heat, drought, and infection risk.                                                 |
| 2024        | Regional-Local (AZ) | OPB           | Giant old saguaros can be resilient. It's baby saguaros researchers are worried about | <a href="https://www.opb.org/article/2024/08/14/giant-old-saguaros-can-be-resilient-it-s-baby-saguaros-researchers-are-worried-about/">https://www.opb.org/article/2024/08/14/giant-old-saguaros-can-be-resilient-it-s-baby-saguaros-researchers-are-worried-about/</a>                                                                                                           | The young seedlings are more vulnerable to extreme conditions, which could affect the future regeneration of the species. |
| 2024        | Regional-Local (AZ) | KPBS          | Giant old saguaros can be resilient. It's baby saguaros researchers are worried about | <a href="https://www.opb.org/article/2024/08/14/giant-old-saguaros-can-be-resilient-it-s-baby-saguaros-researchers-are-worried-about/">https://www.opb.org/article/2024/08/14/giant-old-saguaros-can-be-resilient-it-s-baby-saguaros-researchers-are-worried-about/</a>                                                                                                           | The young seedlings are more vulnerable to extreme conditions, which could affect the future regeneration of the species. |

| <b>Year</b> | <b>Scope</b>        | <b>Outlet</b>                   | <b>Title</b>                                                                                               | <b>Link</b>                                                                                                                                                                                                                                                                                       | <b>Description</b>                                                                                                 |
|-------------|---------------------|---------------------------------|------------------------------------------------------------------------------------------------------------|---------------------------------------------------------------------------------------------------------------------------------------------------------------------------------------------------------------------------------------------------------------------------------------------------|--------------------------------------------------------------------------------------------------------------------|
| 2024        | Regional-Local (AZ) | Arizona's Family                | Are the recent hot summers stressing out Phoenix-based saguaros?                                           | <a href="https://www.azfamily.com/2024/09/12/are-recent-hot-summers-stressing-out-phoenix-based-saguaros/">https://www.azfamily.com/2024/09/12/are-recent-hot-summers-stressing-out-phoenix-based-saguaros/</a>                                                                                   | Local segment citing DBG figures and heat/drought linkage.                                                         |
| 2025        | National (US)       | CBS News                        | Arizona's iconic saguaro cactus was built for desert heat. Rising temperatures are pushing it to the brink | <a href="https://www.cbsnews.com/news/arizona-saguaro-cactus-built-desert-heat-rising-temperatures-pushing-to-brink/">https://www.cbsnews.com/news/arizona-saguaro-cactus-built-desert-heat-rising-temperatures-pushing-to-brink/</a>                                                             | National broadcast reporting rising saguaro mortality in Arizona.                                                  |
| 2025        | National (US)       | Axios Phoenix                   | Scorching saguaros: Climate extremes are killing cactuses                                                  | <a href="https://www.axios.com/local/phoenix/2025/05/19/scorching-saguaros-heat-drought-cactus-deaths">https://www.axios.com/local/phoenix/2025/05/19/scorching-saguaros-heat-drought-cactus-deaths</a>                                                                                           | DBG notes tracked ~1,000 saguaros; stress and mortality increased after 2021                                       |
| 2025        | Regional-Local (AZ) | ABC15 Arizona in Phoenix (KNXV) | Arizona's most resilient desert species facing pressure amid the state's hotter summers                    | <a href="https://www.abc15.com/weather/impact-earth/arizonas-most-resilient-desert-species-facing-pressure-amid-the-states-hotter-summers">https://www.abc15.com/weather/impact-earth/arizonas-most-resilient-desert-species-facing-pressure-amid-the-states-hotter-summers</a>                   | DBG say saguaro mortality rates have jumped to nearly 7 percent in recent years,                                   |
| 2025        | International       | CBS Evening News (YouTube)      | The desert is getting too hot for the saguaro cactus                                                       | <a href="https://www.youtube.com/watch?v=2p2Zf22PE3E">https://www.youtube.com/watch?v=2p2Zf22PE3E</a>                                                                                                                                                                                             | Global segment on saguaros collapsing during multi-week extreme heat events.                                       |
| 2025        | Regional-Local (AZ) | Arizona's Family                | Arizona's extreme heat threatens iconic saguaro cactus, researchers say                                    | <a href="https://www.azfamily.com/2025/05/24/arizonas-extreme-heat-threatens-iconic-saguaro-cactus-researchers-say/">https://www.azfamily.com/2025/05/24/arizonas-extreme-heat-threatens-iconic-saguaro-cactus-researchers-say/</a>                                                               | Researchers warn that extreme heat is stressing the saguaro cacti, causing disease and a near absence of seedlings |
| 2025        | Regional-Local (AZ) | Rosie on the House              | The Mighty Saguaro, Radio interview                                                                        | <a href="https://rosieonthehouse.com/outdoor-living-hour-saguaros-with-dr-tania-hernandez-of-the-arizona-botanical-garden-and-author-barbara-bash/">https://rosieonthehouse.com/outdoor-living-hour-saguaros-with-dr-tania-hernandez-of-the-arizona-botanical-garden-and-author-barbara-bash/</a> | DBG encourages citizens to join the saguaro protection project.                                                    |

**Table S2.**  
**Population genetics summary statistics from 46,195 genome-wide SNPs.**

| <b>Group</b>      | <b><i>n</i></b> | <b>Observed Heterozygosity</b> | <b>Expected Heterozygosity</b> | <b>Inbreeding coefficient (FIS)</b> | <b>Nucleotide diversity (<math>\pi</math>)</b> | <b>Genome-wide Tajima's D</b> | <b>Percentage of segregating sites</b> | <b>Percentage of private sites</b> | <b>Deleterious load (x100)</b> |
|-------------------|-----------------|--------------------------------|--------------------------------|-------------------------------------|------------------------------------------------|-------------------------------|----------------------------------------|------------------------------------|--------------------------------|
| All samples       | 248             | 0.1603                         | 0.1907                         | 0.1616                              | 0.1911                                         | 0.8519                        | 100                                    | 0                                  | 0.913±0.630                    |
| South All         | 94              | <b>0.1635</b>                  | <b>0.1953</b>                  | <b>0.1685</b>                       | <b>0.1964</b>                                  | <b>0.4596</b>                 | <b>83.4711</b>                         | <b>2.1494</b>                      | <b>1.00±0.681</b>              |
| North All*        | 154             | <b>0.1583</b>                  | <b>0.1856</b>                  | <b>0.1503</b>                       | <b>0.1862</b>                                  | <b>0.5549</b>                 | <b>98.6622</b>                         | <b>0</b>                           | <b>0.857±0.593</b>             |
| Wild              | 107             | 0.1554                         | 0.1688                         | 0.0838                              | 0.1696                                         | 1.1303                        | 62.8831                                | 2.0938                             | 0.826±0.566                    |
| <i>Ex-</i> DBG    | 23              | 0.1604                         | 0.1905                         | 0.181                               | 0.195                                          | 0.2115                        | 79.2819                                | 0.2709                             | 0.983±0.726                    |
| <i>situ</i> Urban | 24              | 0.1694                         | 0.192                          | 0.1402                              | 0.1963                                         | 0.0652                        | 83.1059                                | 0.8411                             | 0.875±0.579                    |

\*Although the North-All group includes individuals currently maintained in ex situ collections, these samples derive from the North lineage, as saguaros are not artificially cultivated and thus reflect their original wild provenance.

**Table S3.**  
**SNP datasets and filtering details.**

| <b>Name of dataset</b>                | <b>VCF-1</b>                                     | <b>VCF-2</b>                                                             | <b>VCF-3</b>                         | <b>VCF-4</b>                         |
|---------------------------------------|--------------------------------------------------|--------------------------------------------------------------------------|--------------------------------------|--------------------------------------|
| <b>Analyses</b>                       | <b>Population structure</b>                      | <b>Genetic diversity and differentiation</b>                             | <b>Wild saguaro genetics</b>         | <b>Demographic inference</b>         |
| <b>Source</b>                         | Stacks output                                    | Stacks output                                                            | VCF-1                                | VCF-1                                |
| <b>Sample group</b>                   | All individuals (including technical duplicates) | Wild and <i>ex situ</i> individuals (duplicated and odd samples removed) | Wild individuals only                | SameasVCF-2                          |
| <b>Number of individuals</b>          | 261                                              | 248                                                                      | 201                                  | 248                                  |
| <b>Minimum genotype depth</b>         | 4                                                | 4                                                                        | No new filter used                   | No new filter used                   |
| <b>Maximum genotype depth</b>         | 250                                              | 250                                                                      | No new filter used                   | No new filter used                   |
| <b>Maximum missing per individual</b> | 0.6                                              | 0.6                                                                      | No new filter used                   | No new filter used                   |
| <b>Maximum missing per locus</b>      | 0.3                                              | 0.3                                                                      | 0.3                                  | 0.3                                  |
| <b>MAF</b>                            | 0.01                                             | 0.01                                                                     | 0.01                                 | 0.01                                 |
| <b>LD</b>                             | $r^2 \geq 0.1$                                   | No filter used                                                           | No filter used                       | $r^2 \geq 0.1$                       |
| <b>Number of SNPs</b>                 | 19,280 (46,647 without this filter)              | 46,195                                                                   | 44,711                               | 19,000                               |
| <b>Used for</b>                       | PCA, Admixture, ML Tree and UPGMA                | AMOVA, snpR stats, PiXY gene analysis, selection analysis                | Genetic differentiation, GWAS, RDA   | Demographic inference                |
| <b>VCFmd5sum</b>                      | eff0e56cc419e0805a99ebb<br>b8c014398             | b70579ca1ada0d95ff51747<br>9602e94e2                                     | 9e235d956f6151db2a4da1<br>93d2b79225 | c72ab588e23751ba849abff2<br>54becb54 |

**Table S4.****Candidate genes under divergent selection between North and South saguaro lineages.**

These genes were identified as those with  $\Delta\pi > 0.2$ ,  $F_{ST} > 0.25$ , and opposite Tajima's D signs among North and South lineages.

| GeneID       | $\Delta\pi$ (S-N) | FST   | Tajima's D (N/S) | Focus lineage | Description / Functional annotation                    |
|--------------|-------------------|-------|------------------|---------------|--------------------------------------------------------|
| Cgig2_019831 | 0.388             | 0.262 | 1.74/-1.71       | North         | Unknown function                                       |
| Cgig2_017565 | 0.353             | 0.305 | 2.78/-0.07       | North         | Unknown function                                       |
| Cgig2_023402 | 0.260             | 0.254 | -1.48/0.42       | South         | TRAFAC class myosin-kinesin ATPase superfamily protein |
| Cgig2_012159 | 0.271             | 0.268 | -0.43/1.88       | South         | CRISP family protein                                   |
| Cgig2_011450 | 0.280             | 0.361 | -0.39/1.99       | South         | Alpha beta-hydrolase superfamily protein               |
| Cgig2_024234 | 0.285             | 0.329 | -0.73/1.61       | South         | External alternative NAD(P)H-ubiquinone oxidoreductase |
| Cgig2_000565 | 0.288             | 0.323 | -0.72/1.65       | South         | Unknown function                                       |
| Cgig2_022772 | 0.301             | 0.415 | -0.13/2.48       | South         | Pentatricopeptide repeat-containing protein (PPR)      |
| Cgig2_033157 | 0.301             | 0.348 | -0.39/2.15       | South         | Plant lipid-transfer protein (LTP) family              |
| Cgig2_007705 | 0.324             | 0.254 | -0.01/2.78       | South         | Conserved protein UCP012943                            |
| Cgig2_006466 | 0.329             | 0.268 | -1.09/1.56       | South         | AT-hook DNA-binding protein                            |
| Cgig2_019515 | 0.330             | 0.251 | -0.37/2.45       | South         | Transcription factor TFIID (TATA-binding protein)      |
| Cgig2_030266 | 0.343             | 0.329 | -1.26/1.45       | South         | Protein folding chaperone (ATP hydrolysis-dependent)   |
| Cgig2_016797 | 0.357             | 0.292 | -0.46/2.51       | South         | Unknown function                                       |
| Cgig2_016798 | 0.357             | 0.292 | -0.46/2.51       | South         | Unknown function (duplicate locus)                     |
| Cgig2_019070 | 0.379             | 0.322 | -0.09/3.20       | South         | Unknown function                                       |
| Cgig2_001666 | 0.381             | 0.303 | -0.23/3.07       | South         | Helicase protein                                       |
| Cgig2_022771 | 0.386             | 0.443 | -0.45/2.85       | South         | Unknown function                                       |
| Cgig2_027032 | 0.390             | 0.309 | -0.31/3.03       | South         | Hydroxyproline-rich glycoprotein family protein        |
| Cgig2_008678 | 0.410             | 0.418 | -0.95/2.46       | South         | Vesicle transport protein                              |
| Cgig2_022770 | 0.463             | 0.455 | -0.45/3.52       | South         | Heat-shock protein 90                                  |
| Cgig2_033583 | 0.500             | 0.588 | -0.28/4.07       | South         | Unknown function                                       |
| Cgig2_026828 | -0.451            | 0.311 | 3.48/-0.16       | North         | Vesicle transport protein                              |
| Cgig2_032487 | -0.299            | 0.272 | 1.15/-1.64       | North         | Unknown function                                       |
| Cgig2_032488 | -0.299            | 0.272 | 1.15/-1.64       | North         | Unknown function (duplicate window)                    |
| Cgig2_031306 | 0.271             | 0.259 | -0.02/2.28       | South         | Phosphate transporter PHO1 homolog                     |
| Cgig2_032295 | 0.276             | 0.282 | -0.63/1.64       | South         | Protein FANTASTIC FOUR                                 |
| Cgig2_015686 | 0.276             | 0.400 | -0.03/2.37       | South         | Unknown function                                       |
| Cgig2_012415 | 0.298             | 0.254 | -0.06/2.54       | South         | LRR receptor-like serine/threonine kinase              |
| Cgig2_014336 | 0.301             | 0.278 | -0.20/2.41       | South         | Plant mobile domain protein                            |
| Cgig2_020446 | 0.303             | 0.285 | -0.28/2.33       | South         | Unknown function                                       |
| Cgig2_012270 | 0.314             | 0.439 | -0.12/2.59       | South         | Vacuolar fusion protein CCZ1 homolog                   |
| Cgig2_016300 | 0.314             | 0.335 | -0.26/2.45       | South         | Type III restriction enzyme (res subunit)              |
| Cgig2_013878 | 0.335             | 0.255 | -0.43/2.44       | South         | Eukaryotic translation initiation factor isoform       |

|              |       |       |            |       |                                                     |
|--------------|-------|-------|------------|-------|-----------------------------------------------------|
| Cgig2_030267 | 0.344 | 0.253 | -0.07/2.90 | South | Prohibitin-3                                        |
| Cgig2_020395 | 0.355 | 0.260 | -0.55/2.43 | South | 50S ribosomal protein 5                             |
| Cgig2_033197 | 0.415 | 0.345 | -0.27/3.32 | South | Clp protease-related protein<br>(At4g12060 homolog) |
| Cgig2_002414 | 0.434 | 0.375 | -0.28/3.49 | South | Unknown function                                    |
| Cgig2_029364 | 0.435 | 0.433 | -0.40/3.31 | South | AWPM-19-like membrane<br>family protein             |
| Cgig2_010757 | 0.457 | 0.424 | -0.32/3.63 | South | Importin-9                                          |
| Cgig2_012216 | 0.463 | 0.463 | -0.13/3.91 | South | HNH endonuclease                                    |

---

**Table S5.**

**Association tests between Health-Score and the environmental ordination (PCA).** Linear mixed effects models were set to control for genetic group (Q) and kinship (K). P values correspond to Type II Wald Chi-square tests.

| <b>Variable</b>    | <b>Variable category</b> | <b>Correlation value (R)</b> | <b>FDR-adjusted P value</b> |
|--------------------|--------------------------|------------------------------|-----------------------------|
| hms_median         | Drought                  | -0.11820905                  | 1.52E-03                    |
| had_third_quartile | Drought                  | 0.10646657                   | 2.18E-02                    |
| hms_third_quartile | Drought                  | -0.09600398                  | 1.14E-01                    |
| had_mean           | Drought                  | 0.04935119                   | 9.87E-01                    |
| env_PC1            | PCA                      | -0.04271489                  | 3.10E-12                    |
| env_PC2            | PCA                      | 0.20470545                   | 3.76E-02                    |
| bio14              | Precipitation            | 0.29763945                   | 1.39E-02                    |
| cfvo               | Soil                     | 0.41523945                   | 1.72E-06                    |
| cec                | Soil                     | 0.19598772                   | 1.39E-03                    |
| ph                 | Soil                     | -0.29357457                  | 5.43E-03                    |
| soc                | Soil                     | 0.10508791                   | 1.05E-01                    |
| sand               | Soil                     | -0.13448592                  | 3.34E-01                    |
| bio5               | Temperature              | -0.3193824                   | 2.07E-07                    |
| bio8               | Temperature              | 0.21039274                   | 3.33E-06                    |
| bio9               | Temperature              | -0.27510541                  | 5.82E-04                    |
| bio2               | Temperature              | -0.18351356                  | 5.92E-03                    |

**Table S6.**

**Environmental differentiation tests between North and South populations for the current climatic scenario.** Twenty-five uncorrelated variables ( $r > 0.90$ ) are shown. FDR-corrected P values correspond to ANOVA Type II tests. P values were corrected for multiple testing using the Benjamini–Hochberg False Discovery Rate (FDR). Effect sizes were calculated using Cohen’s method.

| Variable           | Variable category | FDR-adjusted P value | Effect size |
|--------------------|-------------------|----------------------|-------------|
| env_PC1_no_drought | PCA               | 1.86E-45             | 2.7036      |
| env_PC1            | PCA               | 8.60E-45             | 2.6611      |
| bio15              | Precipitation     | 5.12E-43             | 2.5652      |
| bio7               | Temperature       | 2.68E-41             | 2.4778      |
| silt               | Soil              | 1.28E-30             | 1.9733      |
| hms_median         | Drought           | 6.92E-24             | 1.6594      |
| bio13              | Precipitation     | 9.20E-23             | 1.6045      |
| bio8               | Temperature       | 3.80E-14             | 1.1775      |
| sand               | Soil              | 2.34E-13             | 1.1338      |
| bio5               | Temperature       | 5.33E-12             | 1.0596      |
| hms_mean           | Drought           | 2.31E-11             | 1.0234      |
| bio12              | Precipitation     | 5.62E-11             | 1.0007      |
| bio19              | Precipitation     | 2.31E-10             | 0.9644      |
| bio14              | Precipitation     | 8.11E-09             | 0.8708      |
| bio10              | Temperature       | 6.08E-08             | 0.8145      |
| bio1               | Temperature       | 9.48E-08             | 0.801       |
| ph                 | Soil              | 2.44E-05             | 0.6266      |
| bio17              | Precipitation     | 4.05E-05             | 0.6082      |
| had_mean           | Drought           | 6.83E-04             | 0.5035      |
| had_third_quartile | Drought           | 1.68E-03             | 0.466       |
| cfvo               | Soil              | 1.17E-02             | 0.373       |
| env_PC2            | PCA               | 1.84E-02             | 0.3489      |
| bio9               | Temperature       | 5.71E-02             | 0.2846      |
| bio2               | Temperature       | 9.02E-02             | 0.2544      |
| soc                | Soil              | 3.89E-01             | 0.1357      |
| cec                | Soil              | 4.24E-01             | 0.1225      |
| hms_third_quartile | Drought           | 4.40E-01             | 0.1178      |
| env_PC2_no_drought | PCA               | 9.64E-01             | 0.0133      |
| clay               | Soil              | 9.86E-01             | 0.0024      |

**TableS7.**  
**Marginal genetic variance explained by individual RDA predictors.**

| <b>Variable</b>    | <b>Genetic variance explained (%)</b> | <b>P value</b> |
|--------------------|---------------------------------------|----------------|
| bio14              | 1.79                                  | 0.000999001    |
| bio8               | 1.19                                  | 0.000999001    |
| soc                | 1.1                                   | 0.000999001    |
| ph                 | 1.06                                  | 0.000999001    |
| had_third_quartile | 0.97                                  | 0.001998002    |
| bio9               | 0.95                                  | 0.000999001    |
| bio5               | 0.93                                  | 0.000999001    |
| had_mean           | 0.93                                  | 0.001998002    |
| bio2               | 0.92                                  | 0.000999001    |
| cec                | 0.88                                  | 0.000999001    |
| hms_third_quartile | 0.81                                  | 0.000999001    |
| sand               | 0.79                                  | 0.001998002    |
| cfvo               | 0.69                                  | 0.003996004    |
| hms_median         | 0.67                                  | 0.015984016    |

**Table S8a.**

**Candidate SNP-environment associations.** Candidate adaptive single-nucleotide polymorphisms (SNPs) significantly associated with environmental variables and environmental ordination axes identified through genotype-environment association analyses. For each SNP, the table reports the raw P value, false discovery rate (FDR), sample size (n), associated environmental predictor, predictor category, genomic location, and nearest annotated gene.

| SNP                           | P value  | FDR      | Env. predictor         | n   | Category    | Chromosome            | Position | Associated gene | Locus                                     |
|-------------------------------|----------|----------|------------------------|-----|-------------|-----------------------|----------|-----------------|-------------------------------------------|
| JAKOGI010005138<br>.1_3137    | 2.67E-11 | 1.19E-06 | hms_third_<br>quartile | 192 | Drought     | JAKOGI01000<br>5138.1 | 3137     | Cgig2_014344    | JAKOGI01000513<br>8.1:1272-4151           |
| JAKOGI010000002<br>.1_1708068 | 8.24E-11 | 1.84E-06 | bio8                   | 192 | Temperature | JAKOGI01000<br>0002.1 | 1708068  | Cgig2_014691    | JAKOGI01000000<br>2.1:1695261-<br>1711118 |
| JAKOGI010000270<br>.1_751529  | 2.82E-12 | 1.26E-07 | bio8                   | 189 | Temperature | JAKOGI01000<br>0270.1 | 751529   | Cgig2_025494    | JAKOGI01000027<br>0.1:744284-<br>769660   |
| JAKOGI010000729<br>.1_361226  | 2.86E-11 | 6.37E-07 | sand                   | 201 | Soil        | JAKOGI01000<br>0729.1 | 361226   | Cgig2_022984    | JAKOGI01000072<br>9.1:336609-<br>363267   |
| JAKOGI010000134<br>.1_249246  | 8.80E-12 | 3.92E-07 | sand                   | 198 | Soil        | JAKOGI01000<br>0134.1 | 249246   | Cgig2_011008    | JAKOGI01000013<br>4.1:243547-<br>249110   |
| JAKOGI010000008<br>.1_307729  | 7.80E-12 | 1.36E-07 | PC2                    | 176 | PCA         | JAKOGI01000<br>0008.1 | 307729   | Cgig2_018149    | JAKOGI01000000<br>8.1:306175-<br>310878   |
| JAKOGI010000156<br>.1_269330  | 4.63E-12 | 1.36E-07 | PC2                    | 145 | PCA         | JAKOGI01000<br>0156.1 | 269330   | Cgig2_019061    | JAKOGI01000015<br>6.1:268594-<br>275239   |
| JAKOGI010000822<br>.1_314674  | 5.79E-10 | 2.87E-06 | PC2                    | 161 | PCA         | JAKOGI01000<br>0822.1 | 314674   | Cgig2_007096    | JAKOGI01000082<br>2.1:312713-<br>320794   |
| JAKOGI010001073<br>.1_55981   | 3.15E-10 | 2.01E-06 | PC2                    | 184 | PCA         | JAKOGI01000<br>1073.1 | 55981    | Cgig2_023240    | JAKOGI01000107<br>3.1:53822-59525         |
| JAKOGI010003692<br>.1_33249   | 5.74E-10 | 2.87E-06 | PC2                    | 176 | PCA         | JAKOGI01000<br>3692.1 | 33249    | Cgig2_012478    | JAKOGI01000369<br>2.1:33260-43311         |

**Table S8b.**

**Functional information of genes reported in Table 8a.** For each SNP, the associated gene, genomic annotation, full Gene Ontology (GO) term identifiers, condensed functional interpretation of GO categories, and PFAM protein domains are reported when available.

| SNP                       | Associated gene | Description                                 | GOs (full list)                                                                                                                                                                                                                                                                                                                                                                                                                                                                                                                                                                                                                                                                                                                                                                                                                                                                                                                                                                                                                                                     | Condensed functional label                    | PFAMs         |
|---------------------------|-----------------|---------------------------------------------|---------------------------------------------------------------------------------------------------------------------------------------------------------------------------------------------------------------------------------------------------------------------------------------------------------------------------------------------------------------------------------------------------------------------------------------------------------------------------------------------------------------------------------------------------------------------------------------------------------------------------------------------------------------------------------------------------------------------------------------------------------------------------------------------------------------------------------------------------------------------------------------------------------------------------------------------------------------------------------------------------------------------------------------------------------------------|-----------------------------------------------|---------------|
| JAKOGI010005138.1_3137    | Cgig2_014344    | Unknown                                     | Unknown                                                                                                                                                                                                                                                                                                                                                                                                                                                                                                                                                                                                                                                                                                                                                                                                                                                                                                                                                                                                                                                             | Unknown                                       | Unknown       |
| JAKOGI010000002.1_1708068 | Cgig2_014691    | Methylmalonate-semialdehyde dehydrogenase   | GO:0003674,GO:0005488,GO:0005507,GO:0005575,GO:0005622,GO:0005623,GO:0005737,GO:0005739,GO:0006950,GO:0006979,GO:0008150,GO:0043167,GO:0043169,GO:0043226,GO:0043227,GO:0043229,GO:0043231,GO:0044424,GO:0044444,GO:0044464,GO:0046872,GO:0046914,GO:0050896                                                                                                                                                                                                                                                                                                                                                                                                                                                                                                                                                                                                                                                                                                                                                                                                        | Metabolic regulation and stress response      | Aldedh        |
| JAKOGI010000270.1_751529  | Cgig2_025494    | Actin filament capping and severing protein | GO:0001101,GO:0003674,GO:0003779,GO:0005488,GO:0005515,GO:0005575,GO:0005622,GO:0005623,GO:0005737,GO:0005829,GO:0005856,GO:0006810,GO:0006996,GO:0007010,GO:0007015,GO:0007275,GO:0008064,GO:0008092,GO:0008150,GO:0008154,GO:0009653,GO:0009719,GO:0009725,GO:0009737,GO:0009888,GO:0009987,GO:0010015,GO:0010033,GO:0010035,GO:0010038,GO:0010053,GO:0010054,GO:0010639,GO:0015629,GO:0016043,GO:0016049,GO:0016482,GO:0021700,GO:0022411,GO:0022622,GO:0030029,GO:0030036,GO:0030042,GO:0030154,GO:0030832,GO:0030833,GO:0030834,GO:0030835,GO:0030837,GO:0031333,GO:0032271,GO:0032272,GO:0032432,GO:0032501,GO:0032502,GO:0032535,GO:0032956,GO:0032970,GO:0032984,GO:0033043,GO:0033993,GO:0040007,GO:0042221,GO:0043226,GO:0043228,GO:0043229,GO:0043232,GO:0043242,GO:0043244,GO:0043254,GO:0043624,GO:0043933,GO:0044087,GO:0044422,GO:0044424,GO:0044430,GO:0044444,GO:0044446,GO:0044464,GO:0044877,GO:0046907,GO:0048364,GO:0048468,GO:0048469,GO:0048519,GO:0048523,GO:0048588,GO:0048589,GO:0048731,GO:0048764,GO:0048765,GO:0048767,GO:0048856,GO:0 | Cytoskeleton organization and stress response | Gelsolin,VH P |

|                          |              |                                        |                                                                                                                                                                                                                                                                                                                                                                                                                                                                                                                                                                                                                                                    |                                               |                              |
|--------------------------|--------------|----------------------------------------|----------------------------------------------------------------------------------------------------------------------------------------------------------------------------------------------------------------------------------------------------------------------------------------------------------------------------------------------------------------------------------------------------------------------------------------------------------------------------------------------------------------------------------------------------------------------------------------------------------------------------------------------------|-----------------------------------------------|------------------------------|
|                          |              |                                        | 048869,GO:0050789,GO:0050794,GO:0050896,GO:0051014,GO:0051015,GO:0051128,GO:0051129,GO:0051179,GO:0051234,GO:0051261,GO:0051493,GO:0051494,GO:0051592,GO:0051641,GO:0051649,GO:0051693,GO:0060560,GO:0065007,GO:0065008,GO:0071695,GO:0071840,GO:0080147,GO:0090066,GO:0090558,GO:0090627,GO:0097305,GO:0097435,GO:0099402,GO:0099636,GO:0110053,GO:1901700,GO:1901879,GO:1901880,GO:1902903,GO:1902904,GO:1905392                                                                                                                                                                                                                                 |                                               |                              |
| JAKOGI010000729.1_361226 | Cgig2_022984 | Protein of unknown function (DUF810)   | GO:0005575,GO:0005622,GO:0005623,GO:0005737,GO:0005886,GO:0005911,GO:0008150,GO:0009506,GO:0009987,GO:0010118,GO:0016020,GO:0030054,GO:0044424,GO:0044464,GO:0055044,GO:0071944                                                                                                                                                                                                                                                                                                                                                                                                                                                                    | Membrane-associated protein, unknown function | DUF810                       |
| JAKOGI010000134.1_249246 | Cgig2_011008 | E3ubiquitin-protein ligase             | GO:0000209,GO:0003674,GO:0003824,GO:0004842,GO:0005575,GO:0006464,GO:0006508,GO:0006511,GO:0006807,GO:0007275,GO:0008150,GO:0008152,GO:0009056,GO:0009057,GO:0009553,GO:0009555,GO:0009561,GO:0009987,GO:0010498,GO:0016020,GO:0016567,GO:0016740,GO:0019538,GO:0019787,GO:0019941,GO:0030163,GO:0032446,GO:0032501,GO:0032502,GO:0036211,GO:0043161,GO:0043170,GO:0043412,GO:0043632,GO:0044237,GO:0044238,GO:0044248,GO:0044257,GO:0044260,GO:0044265,GO:0044267,GO:0048229,GO:0048856,GO:0050789,GO:0050794,GO:0051603,GO:0051726,GO:0055046,GO:0061630,GO:0061659,GO:0065007,GO:0070647,GO:0071704,GO:0140096,GO:1901564,GO:1901565,GO:1901575 | Protein turnover and stress signaling         | zf-C3HC4_2,zf-RING_2,zf-rbx1 |
| JAKOGI010000008.1_307729 | Cgig2_018149 | Squamosa promoter-binding-like protein | GO:0003674,GO:0003676,GO:0003677,GO:0003700,GO:0005488,GO:0005575,GO:0005622,GO:0005623,GO:0005634,GO:0006355,GO:0007275,GO:0008150,GO:0009653,GO:0009889,GO:0009891,GO:0009893,GO:0009965,GO:0010016,GO:0010358,GO:0010468,GO:0010556,GO:0010557,GO:0010604,GO:0010628,GO:0019219,GO:0019222,GO:0031323,GO:0031325,GO:0031326,GO:0031328,GO:0032501,GO:0032502,GO:0040034,GO:0043226,GO:0043227,GO:0043229,GO:0043231,GO:0043565,GO:004442                                                                                                                                                                                                        | Transcriptional regulation and development    | SBP                          |

|                         |              |                                                 |                                                                                                                                                                                                                                                                                                                                                                                                                                                                                                                                                                                                                                                               |                                               |                 |
|-------------------------|--------------|-------------------------------------------------|---------------------------------------------------------------------------------------------------------------------------------------------------------------------------------------------------------------------------------------------------------------------------------------------------------------------------------------------------------------------------------------------------------------------------------------------------------------------------------------------------------------------------------------------------------------------------------------------------------------------------------------------------------------|-----------------------------------------------|-----------------|
|                         |              |                                                 | 4,GO:0044464,GO:0045893,GO:0045935,GO:0048366,GO:0048367,GO:0048506,GO:0048509,GO:0048510,GO:0048518,GO:0048522,GO:0048532,GO:0048731,GO:0048827,GO:0048856,GO:0050789,GO:0050793,GO:0050794,GO:0051171,GO:0051173,GO:0051252,GO:0051254,GO:0060255,GO:0065007,GO:0080090,GO:0097159,GO:0099402,GO:0140110,GO:1901363,GO:1902680,GO:1903506,GO:1903508,GO:1905392,GO:2000112,GO:2001141                                                                                                                                                                                                                                                                       |                                               |                 |
| JAKOGI01000156.1_269330 | Cgig2_019061 | Pseudouridinesynthase                           | Unknown                                                                                                                                                                                                                                                                                                                                                                                                                                                                                                                                                                                                                                                       | RNA modification and translational regulation | TruB_C_2,TruB_N |
| JAKOGI01000822.1_314674 | Cgig2_007096 | Nucleobase-ascorbate transporter                | GO:0003674,GO:0005215,GO:0005345,GO:0005350,GO:0005575,GO:0005623,GO:0005886,GO:0006810,GO:0006811,GO:0006812,GO:0006855,GO:0006863,GO:0008150,GO:0008324,GO:0015075,GO:0015205,GO:0015207,GO:0015208,GO:0015210,GO:0015238,GO:0015291,GO:0015293,GO:0015294,GO:0015318,GO:0015851,GO:0015853,GO:0015854,GO:0015855,GO:0015857,GO:0015893,GO:0016020,GO:0022804,GO:0022857,GO:0022890,GO:0034220,GO:0035344,GO:0042221,GO:0042493,GO:0044464,GO:0050896,GO:0051179,GO:0051234,GO:0055085,GO:0071702,GO:0071705,GO:0071944,GO:0072530,GO:0072531,GO:0098655,GO:0098657,GO:0098702,GO:0098710,GO:0098721,GO:0098739,GO:1903716,GO:1903791,GO:1904082,GO:1904823 | Membrane transport and nutrient exchange      | Xan_ur_permease |
| JAKOGI01001073.1_55981  | Cgig2_023240 | Sec-independent protein translocase subunitTatB | GO:0003674,GO:0005215,GO:0005575,GO:0005622,GO:0005623,GO:0005737,GO:0005886,GO:0006605,GO:0006612,GO:0006810,GO:0006886,GO:0006950,GO:0008104,GO:0008150,GO:0008320,GO:0008565,GO:0009266,GO:0009409,GO:0009507,GO:0009526,GO:0009534,GO:0009535,GO:0009536,GO:0009579,GO:0009628,GO:0009889,GO:0009941,GO:0009977,GO:0010119,GO:0015031,GO:0015291,GO:0015399,GO:0015405,GO:0015450,GO:0015833,GO:0016020,GO:0017038,GO:0019222,GO:0022804,GO:0022857,GO:0022884,GO:0031323,GO:0031967,GO:0031975,GO:0031976,GO:0031984,GO:0032991,GO:0033036,GO:0033281,GO:0033365,GO:003                                                                                  | Protein translocation and stress response     | MttA_Hcf106     |

|                                 |              |                                                   |                                                                                                                                                                                                                                                                                                                                                                                                                                                                                                                                                                                                                                                         |                                                     |                           |
|---------------------------------|--------------|---------------------------------------------------|---------------------------------------------------------------------------------------------------------------------------------------------------------------------------------------------------------------------------------------------------------------------------------------------------------------------------------------------------------------------------------------------------------------------------------------------------------------------------------------------------------------------------------------------------------------------------------------------------------------------------------------------------------|-----------------------------------------------------|---------------------------|
| JAKOGI0100<br>03692.1_3324<br>9 | Cgig2_012478 | Pentatricopeptide<br>repeat-containing<br>protein | 4357,GO:0034613,GO:0042651,GO:0042886,GO:0042887,GO:0043226,GO:0043227,GO:0043229,GO:0043231,GO:0043953,GO:0044422,GO:0044424,GO:0044425,GO:0044434,GO:0044435,GO:0044436,GO:0044444,GO:0044446,GO:0044459,GO:0044464,GO:0044743,GO:0045036,GO:0045038,GO:0045184,GO:0046907,GO:0048518,GO:0048522,GO:0048583,GO:0050789,GO:0050794,GO:0050896,GO:0051179,GO:0051234,GO:0051641,GO:0051649,GO:0055035,GO:0055085,GO:0065002,GO:0065007,GO:0070727,GO:0071702,GO:0071705,GO:0071806,GO:0071944,GO:0072594,GO:0072596,GO:0072598,GO:0072657,GO:0080134,GO:0090150,GO:0098796,GO:0098797,GO:1902456,GO:1902458,GO:1903426,GO:1904680,GO:2000070,GO:2000377 | Organelle gene<br>regulation and stress<br>response | PPR,PPR_1,<br>PPR_2,PPR_3 |
|                                 |              |                                                   | GO:0003674,GO:0003676,GO:0003723,GO:0003824,GO:0004518,GO:0004519,GO:0005488,GO:0005575,GO:0005622,GO:0005623,GO:0006139,GO:0006725,GO:0006807,GO:0008150,GO:0008152,GO:0009451,GO:0009987,GO:0016070,GO:0016787,GO:0016788,GO:0034641,GO:0043170,GO:0043226,GO:0043227,GO:0043229,GO:0043231,GO:0043412,GO:0044237,GO:0044238,GO:0044424,GO:0044464,GO:0046483,GO:0071704,GO:0090304,GO:0090305,GO:0097159,GO:1901360,GO:1901363                                                                                                                                                                                                                       |                                                     |                           |

**Table S9.**  
**ANOVA for the effect of the genetic group on the genomic offset.**

| <b>Fixed Effect</b>     | <b>Chi-squared value</b> | <b>Degrees of Freedom</b> | <b>P value</b> |
|-------------------------|--------------------------|---------------------------|----------------|
| Genetic group           | 39.19386                 | 1                         | 3.83e-10       |
| Scenario (SSP)          | 9142.90443               | 2                         | 0              |
| Geneticgroup X Scenario | 38.8483                  | 2                         | 3.66e-09       |
